# Supplementary material
Source: MDPI journal article supplement (https://www.mdpi.com/2076-3417/12/4/2062)
Supplement: s1 [file s1]

Supplementary Materials

**Physics-based simulation of sequences with foreshocks,  
aftershocks and multiple main shocks in Italy**

Rodolfo Console, Paola Vannoli and Roberto Carluccio

December 21, 2021

Table S1: Geometric and kinematics parameters of the 198 quadrilateral fault segments derived from the 43 Composite Seismogenic Sources (CSS) of DISS v. 3.3.0 (DISS Working Group, 2021; <http://diss.ingv.it>) of the northern and central Apennines. Geometric coordinates refer to the upper left edge of the fault. **Name**: Identifier of the CSS of DISS; **#segs**: number of fault segments within the CSS; **Depth**: depth of the upper edge of the fault from the sea level; **Lenx1**: length of the top of the fault segment measured along its strike; **Offsx2**: the horizontal offset of the left bottom corner with respect to the left top corner, in the direction of the strike; **Lenx2**: length of the bottom of the fault segment; **Width**: width of the fault segment measured along its dip; **Sliprate**: maximum slip-rate of the fault. See the sketch of a quadrilateral fault segment in Figure S4.

| Name    | #segs | Lon<br>(°) | Lat<br>(°) | Depth<br>(km) | Strike<br>(°) | Dip<br>(°) | Rake<br>(°) | Lenx1<br>(km) | Offsx2<br>(km) | Lenx2<br>(km) | width<br>(km) | Sliprate<br>(mm/y) |
|---------|-------|------------|------------|---------------|---------------|------------|-------------|---------------|----------------|---------------|---------------|--------------------|
| ITCS001 | 4     | 11.5818    | 44.3814    | 2             | 120.23        | 35         | 90          | 7.64          | 0              | 8.44          | 10.46         | 0.63               |
|         |       | 11.6649    | 44.347     |               | 109.58        |            |             | 17.84         | -0.8           | 17.98         |               |                    |
|         |       | 11.8757    | 44.2934    |               | 118.38        |            |             | 7.06          | 0.66           | 5.17          |               |                    |
|         |       | 11.9536    | 44.2633    |               | 134.79        |            |             | 19.17         | 1.24           | 17.93         |               |                    |
| ITCS008 | 6     | 13.2804    | 43.7508    | 3             | 107.74        | 37.5       | 90          | 3.4           | 0              | 3.13          | 5.75          | 1.35               |
|         |       | 13.3206    | 43.7416    |               | 114.4         |            |             | 5.51          | 0.27           | 4.96          |               |                    |
|         |       | 13.383     | 43.7213    |               | 121.55        |            |             | 9.72          | 0.28           | 8.85          |               |                    |
|         |       | 13.4859    | 43.6757    |               | 136.19        |            |             | 17.42         | 0.59           | 16.09         |               |                    |
|         |       | 13.6356    | 43.5627    |               | 154.72        |            |             | 23.86         | 0.74           | 22.61         |               |                    |
|         |       | 13.7613    | 43.3684    |               | 167.34        |            |             | 6.18          | 0.5            | 5.67          |               |                    |
| ITCS009 | 1     | 10.043     | 44.9953    | 2             | 126.85        | 30         | 105         | 51.81         | 0              | 51.81         | 12            | 0.53               |
| ITCS011 | 9     | 11.8679    | 44.4532    | 2             | 103.3         | 35         | 90          | 4.44          | 0              | 3.81          | 13.95         | 0.33               |
|         |       | 11.9222    | 44.4442    |               | 109.57        |            |             | 3.77          | 0.63           | 1.97          |               |                    |
|         |       | 11.9668    | 44.4329    |               | 121.29        |            |             | 2.32          | 1.17           | -0.32         |               |                    |
|         |       | 11.9917    | 44.4221    |               | 135.87        |            |             | 6.6           | 1.46           | 6.64          |               |                    |
|         |       | 12.0496    | 44.3795    |               | 120.88        |            |             | 6.92          | -1.5           | 9.4           |               |                    |
|         |       | 12.1241    | 44.3477    |               | 111.1         |            |             | 2.26          | -0.98          | 1.04          |               |                    |
|         |       | 12.1506    | 44.3403    |               | 132.85        |            |             | 2.07          | 2.19           | -0.66         |               |                    |
|         |       | 12.1696    | 44.3277    |               | 138.22        |            |             | 2.35          | 0.54           | 0.81          |               |                    |
|         |       | 12.1892    | 44.3119    |               | 148.23        |            |             | 8.55          | 1              | 7.55          |               |                    |
| ITCS012 | 7     | 11.5226    | 44.7448    | 2             | 84.2          | 30         | 100         | 9.25          | 0              | 8.07          | 12            | 0.55               |
|         |       | 11.6388    | 44.7535    |               | 97.11         |            |             | 12.86         | 1.18           | 11.19         |               |                    |
|         |       | 11.8       | 44.7395    |               | 102.55        |            |             | 6.65          | 0.49           | 5.25          |               |                    |
|         |       | 11.882     | 44.7266    |               | 112.47        |            |             | 17.39         | 0.9            | 15.29         |               |                    |
|         |       | 12.0848    | 44.6669    |               | 125.68        |            |             | 4             | 1.2            | 1.94          |               |                    |
|         |       | 12.1257    | 44.646     |               | 135.01        |            |             | 4.1           | 0.85           | 2.31          |               |                    |
|         |       | 12.1622    | 44.6198    |               | 145.43        |            |             | 21.86         | 0.95           | 20.91         |               |                    |
| ITCS018 | 3     | 8.9859     | 44.9209    | 2             | 43.67         | 32.5       | 75          | 10.17         | 0              | 10.97         | 11.17         | 0.54               |
|         |       | 9.0749     | 44.987     |               | 33.99         |            |             | 13.15         | -0.8           | 12.93         |               |                    |
|         |       | 9.1684     | 45.085     |               | 46.33         |            |             | 7.89          | 1.02           | 6.88          |               |                    |
| ITCS020 | 9     | 13.4298    | 43.4292    | 3.5           | 143.97        | 30         | 90          | 11.93         | 0              | 10.27         | 15            | 0.4                |
|         |       | 13.5168    | 43.3427    |               | 158.52        |            |             | 24.7          | 1.66           | 21.46         |               |                    |
|         |       | 13.629     | 43.136     |               | 172.41        |            |             | 10.32         | 1.58           | 10.33         |               |                    |
|         |       | 13.6459    | 43.044     |               | 158.37        |            |             | 5.1           | -1.6           | 9.06          |               |                    |
|         |       | 13.6691    | 43.0013    |               | 137.78        |            |             | 5.74          | -2.36          | 6.74          |               |                    |
|         |       | 13.7165    | 42.9631    |               | 149.69        |            |             | 7.3           | 1.36           | 4.57          |               |                    |
|         |       | 13.7617    | 42.9065    |               | 161.74        |            |             | 27.57         | 1.37           | 26.4          |               |                    |
|         |       | 13.8672    | 42.6707    |               | 159.97        |            |             | 8.57          | -0.2           | 6.89          |               |                    |

Continued on next page

**Table S1 – continued from previous page**

| Name    | #segs | Lon<br>(°)                                                               | Lat<br>(°)                                                                | Depth<br>(km) | Strike<br>(°)                                                      | Dip<br>(°) | Rake<br>(°) | Lenx1<br>(km)                                             | Offsx2<br>(km)                                      | Lenx2<br>(km)                                               | Width<br>(km) | Sliprate<br>(mm/y) |
|---------|-------|--------------------------------------------------------------------------|---------------------------------------------------------------------------|---------------|--------------------------------------------------------------------|------------|-------------|-----------------------------------------------------------|-----------------------------------------------------|-------------------------------------------------------------|---------------|--------------------|
|         |       | 13.9029                                                                  | 42.5982                                                                   |               | 176.46                                                             |            |             | 7.91                                                      | 1.88                                                | 6.03                                                        |               |                    |
| ITCS026 | 1     | 10.031                                                                   | 44.1496                                                                   | 1             | 320.48                                                             | 37.5       | 270         | 53.61                                                     | 0                                                   | 53.61                                                       | 14.78         | 1                  |
| ITCS028 | 2     | 12.7361<br>13.0944                                                       | 43.2752<br>42.8586                                                        | 2.5           | 147.92<br>158.89                                                   | 45         | 270         | 54.71<br>28.87                                            | 0<br>1.1                                            | 53.61<br>27.77                                              | 16.26         | 1                  |
| ITCS030 | 2     | 12.634<br>12.7739                                                        | 44.1619<br>44.0739                                                        | 3             | 131.24<br>135.64                                                   | 30         | 90          | 14.86<br>6.32                                             | 0<br>0.27                                           | 14.6<br>6.05                                                | 8             | 0.52               |
| ITCS031 | 6     | 13.5808<br>13.6517<br>13.693<br>13.7243<br>13.7639<br>13.7809            | 43.714<br>43.678<br>43.6504<br>43.624<br>43.5814<br>43.5477               | 1.5           | 125.11<br>132.7<br>139.36<br>146.11<br>159.85<br>154.72            | 32.5       | 90          | 6.97<br>4.53<br>3.87<br>5.71<br>3.99<br>7.52              | 0<br>0.57<br>0.5<br>0.51<br>1.04<br>-0.39           | 6.4<br>3.46<br>2.86<br>4.17<br>3.33<br>7.91                 | 10.24         | 0.91               |
| ITCS032 | 5     | 12.766<br>12.8831<br>13.0342<br>13.1861<br>13.3542                       | 43.9793<br>43.936<br>43.8311<br>43.7664<br>43.6342                        | 3             | 117.36<br>134.06<br>120.54<br>137.28<br>129.3                      | 30         | 90          | 10.55<br>16.83<br>14.18<br>19.98<br>7.41                  | 0<br>1.14<br>-0.92<br>1.15<br>-0.54                 | 9.41<br>16.61<br>13.96<br>19.38<br>7.95                     | 9             | 0.52               |
| ITCS037 | 7     | 13.0453<br>12.9347<br>12.8464<br>12.1815<br>11.9933<br>11.792<br>11.5196 | 42.4781<br>42.5465<br>42.6148<br>43.4138<br>43.5575<br>43.6167<br>43.8804 | 0.5           | 309.45<br>315.91<br>328.46<br>316.53<br>292.29<br>323.64<br>298.67 | 32.5       | 270         | 11.85<br>10.49<br>104<br>22.06<br>17.54<br>36.61<br>33.24 | 0<br>0.66<br>1.29<br>-1.23<br>-2.53<br>3.3<br>-2.61 | 11.19<br>8.53<br>103.94<br>25.81<br>16.76<br>35.91<br>35.85 | 13.96         | 1                  |
| ITCS039 | 1     | 12.3941                                                                  | 44.1917                                                                   | 2             | 133.11                                                             | 30         | 90          | 34.19                                                     | 0                                                   | 34.19                                                       | 16            | 1.07               |
| ITCS041 | 1     | 12.0957                                                                  | 43.6231                                                                   | 1             | 132.6                                                              | 45         | 270         | 20.54                                                     | 0                                                   | 20.54                                                       | 5.66          | 1                  |
| ITCS043 | 6     | 12.8768<br>12.9517<br>13.0068<br>13.0646<br>13.112<br>13.2457            | 44.0281<br>44.0188<br>44.0075<br>43.9847<br>43.9596<br>43.8107            | 2.5           | 99.96<br>105.94<br>118.74<br>126.4<br>147<br>141.9                 | 37.5       | 90          | 6.1<br>4.6<br>5.28<br>4.71<br>19.73<br>5                  | 0<br>0.27<br>0.58<br>0.35<br>0.95<br>-0.23          | 5.82<br>3.74<br>4.35<br>3.42<br>19.01<br>5.23               | 6.57          | 0.52               |
| ITCS044 | 4     | 9.2491<br>9.33<br>9.3903<br>9.7034                                       | 45.1349<br>45.1993<br>45.2192<br>45.1993                                  | 2             | 41.72<br>65.03<br>95.13<br>114.47                                  | 30         | 90          | 9.57<br>5.23<br>24.7<br>28.88                             | 0<br>1.79<br>2.33<br>1.48                           | 7.79<br>1.11<br>20.89<br>27.41                              | 10            | 0.54               |
| ITCS045 | 3     | 9.728<br>9.9101<br>10.0519                                               | 44.9788<br>44.9144<br>44.7967                                             | 2             | 116.67<br>139.46<br>148.73                                         | 30         | 90          | 16.05<br>17.23<br>15.02                                   | 0<br>2.79<br>1.12                                   | 13.26<br>13.31<br>13.9                                      | 16            | 0.63               |
| ITCS046 | 3     | 10.1901<br>10.3558<br>10.6953                                            | 44.6859<br>44.6748<br>44.5802                                             | 2             | 95.56<br>111.38<br>115.16                                          | 30         | 90          | 13.2<br>28.92<br>16.5                                     | 0<br>1.44<br>0.34                                   | 11.75<br>27.13<br>16.16                                     | 12            | 0.63               |
| ITCS047 | 3     | 10.9145<br>11.3483                                                       | 44.5152<br>44.5041                                                        | 2             | 92.2<br>115.01                                                     | 30         | 90          | 34.52<br>9.64                                             | 0<br>2.1                                            | 32.42<br>6.38                                               | 12            | 0.63               |

Continued on next page

**Table S1 – continued from previous page**

| Name    | #segs | Lon<br>(°) | Lat<br>(°) | Depth<br>(km) | Strike<br>(°) | Dip<br>(°) | Rake<br>(°) | Lenx1<br>(km) | Offsx2<br>(km) | Lenx2<br>(km) | Width<br>(km) | Sliprate<br>(mm/y) |
|---------|-------|------------|------------|---------------|---------------|------------|-------------|---------------|----------------|---------------|---------------|--------------------|
|         |       | 11.4581    | 44.4674    |               | 127.73        |            |             | 11.7          | 1.16           | 10.54         |               |                    |
| ITCS049 | 5     | 10.54      | 44.8033    | 3             | 72.69         | 40         | 90          | 7.19          | 0              | 6.58          | 10.89         | 0.16               |
|         |       | 10.6267    | 44.8226    |               | 80.95         |            |             | 2.14          | 0.6            | 1.03          |               |                    |
|         |       | 10.6534    | 44.8256    |               | 87.93         |            |             | 2.23          | 0.51           | 0.99          |               |                    |
|         |       | 10.6816    | 44.8263    |               | 97.97         |            |             | 2.5           | 0.73           | 0.94          |               |                    |
|         |       | 10.7129    | 44.8232    |               | 109.29        |            |             | 9.91          | 0.83           | 9.09          |               |                    |
| ITCS050 | 3     | 11.0866    | 45.0116    | 1             | 107.04        | 40         | 90          | 25.08         | 0              | 26.67         | 10.89         | 0.45               |
|         |       | 11.391     | 44.9463    |               | 85.52         |            |             | 12.23         | -1.59          | 11.69         |               |                    |
|         |       | 11.5454    | 44.9549    |               | 114.11        |            |             | 36.65         | 2.13           | 34.52         |               |                    |
| ITCS051 | 11    | 10.7525    | 44.8637    | 2             | 43.89         | 35         | 90          | 1.46          | 0              | 0.3           | 13.95         | 1.04               |
|         |       | 10.7653    | 44.8731    |               | 55.5          |            |             | 4.89          | 1.16           | 2.65          |               |                    |
|         |       | 10.8163    | 44.8981    |               | 66.3          |            |             | 1.75          | 1.08           | -0.2          |               |                    |
|         |       | 10.8366    | 44.9044    |               | 75.04         |            |             | 4.67          | 0.87           | 3.25          |               |                    |
|         |       | 10.8937    | 44.9153    |               | 80.53         |            |             | 2.45          | 0.55           | 0.96          |               |                    |
|         |       | 10.9243    | 44.9153    |               | 89.96         |            |             | 5.3           | 0.94           | 3.11          |               |                    |
|         |       | 10.9913    | 44.919     |               | 102.42        |            |             | 1.94          | 1.25           | -0.35         |               |                    |
|         |       | 11.0153    | 44.9153    |               | 112.77        |            |             | 3.23          | 1.04           | 1.1           |               |                    |
|         |       | 11.0531    | 44.904     |               | 123.77        |            |             | 2.13          | 1.1            | 1.99          |               |                    |
|         |       | 11.0755    | 44.8934    |               | 114.18        |            |             | 20.82         | -0.96          | 22.4          |               |                    |
|         |       | 11.3156    | 44.8165    |               | 107.92        |            |             | 17.88         | -0.62          | 18.5          |               |                    |
| ITCS052 | 8     | 14.8846    | 42.9591    | 3.3           | 109.19        | 37.5       | 90          | 2.55          | 0              | 1.72          | 5.26          | 0.5                |
|         |       | 14.9142    | 42.9516    |               | 131.66        |            |             | 2.76          | 0.83           | 1.27          |               |                    |
|         |       | 14.9395    | 42.9351    |               | 149.88        |            |             | 14.1          | 0.67           | 13.82         |               |                    |
|         |       | 15.0265    | 42.8255    |               | 139.31        |            |             | 5.84          | -0.39          | 5.99          |               |                    |
|         |       | 15.0731    | 42.7856    |               | 145.94        |            |             | 5.78          | 0.24           | 5.22          |               |                    |
|         |       | 15.1127    | 42.7426    |               | 154.65        |            |             | 5.21          | 0.32           | 3.87          |               |                    |
|         |       | 15.14      | 42.7002    |               | 182.23        |            |             | 9.36          | 1.02           | 8.04          |               |                    |
|         |       | 15.1354    | 42.616     |               | 190.36        |            |             | 7.35          | 0.3            | 7.06          |               |                    |
| ITCS056 | 1     | 12.4401    | 43.4159    | 2             | 131.47        | 20         | 270         | 27.16         | 0              | 27.16         | 14.62         | 1                  |
| ITCS083 | 1     | 10.5825    | 43.9916    | 1             | 304.51        | 37.5       | 270         | 40.15         | 0              | 40.15         | 14.78         | 1                  |
| ITCS103 | 6     | 11.0464    | 44.9476    | 3.5           | 100.63        | 45         | 90          | 3.83          | 0              | 3.03          | 9.19          | 0.5                |
|         |       | 11.0941    | 44.9413    |               | 114.76        |            |             | 5.59          | 0.81           | 4.99          |               |                    |
|         |       | 11.1585    | 44.9204    |               | 111.01        |            |             | 19.73         | -0.21          | 20.03         |               |                    |
|         |       | 11.3917    | 44.857     |               | 109.41        |            |             | 1.72          | -0.09          | 0.86          |               |                    |
|         |       | 11.4122    | 44.8518    |               | 126           |            |             | 2.92          | 0.95           | 2.51          |               |                    |
|         |       | 11.4421    | 44.8364    |               | 116.47        |            |             | 2.59          | -0.54          | 3.14          |               |                    |
| ITCS106 | 13    | 12.9839    | 44.1153    | 2             | 99.58         | 32.5       | 90          | 4.04          | 0              | 3.42          | 9.31          | 0.52               |
|         |       | 13.0337    | 44.1094    |               | 108.6         |            |             | 4.09          | 0.62           | 2.73          |               |                    |
|         |       | 13.0822    | 44.0978    |               | 119.43        |            |             | 6.12          | 0.74           | 4.87          |               |                    |
|         |       | 13.1489    | 44.071     |               | 126.79        |            |             | 4.81          | 0.5            | 5.11          |               |                    |
|         |       | 13.1971    | 44.0452    |               | 115.18        |            |             | 5.31          | -0.8           | 4.84          |               |                    |
|         |       | 13.2572    | 44.0249    |               | 133.62        |            |             | 4.16          | 1.27           | 2.32          |               |                    |
|         |       | 13.2949    | 43.9991    |               | 142.01        |            |             | 3.37          | 0.58           | 4.73          |               |                    |
|         |       | 13.3208    | 43.9753    |               | 114.2         |            |             | 15.25         | -1.94          | 16.71         |               |                    |
|         |       | 13.4941    | 43.9191    |               | 121.19        |            |             | 4.76          | 0.48           | 2.73          |               |                    |
|         |       | 13.5448    | 43.8969    |               | 143.48        |            |             | 3.83          | 1.55           | 0.34          |               |                    |

Continued on next page

**Table S1 – continued from previous page**

| Name    | #segs | Lon<br>(°)                                                                          | Lat<br>(°)                                                                         | Depth<br>(km) | Strike<br>(°)                                                                | Dip<br>(°) | Rake<br>(°) | Lenx1<br>(km)                                                | Offsx2<br>(km)                                            | Lenx2<br>(km)                                                 | Width<br>(km) | Sliprate<br>(mm/y) |
|---------|-------|-------------------------------------------------------------------------------------|------------------------------------------------------------------------------------|---------------|------------------------------------------------------------------------------|------------|-------------|--------------------------------------------------------------|-----------------------------------------------------------|---------------------------------------------------------------|---------------|--------------------|
|         |       | 13.5731<br>13.5887<br>13.6142                                                       | 43.8692<br>43.7943<br>43.7572                                                      |               | 171.25<br>153.5<br>147.27                                                    |            |             | 8.42<br>4.61<br>5.54                                         | 1.94<br>-1.23<br>-0.43                                    | 7.7<br>6.26<br>5.97                                           |               |                    |
| ITCS107 | 8     | 13.9503<br>13.9121<br>13.8926<br>13.8754<br>13.868<br>13.8632<br>13.8559<br>13.8502 | 43.421<br>43.4412<br>43.4545<br>43.4703<br>43.4788<br>43.4892<br>43.5268<br>43.539 | 1.5           | 305.99<br>313.17<br>321.56<br>328.05<br>341.42<br>351.95<br>341.27<br>346.06 | 47.5       | 90          | 3.82<br>2.16<br>2.24<br>1.12<br>1.22<br>4.22<br>1.43<br>6.42 | 0<br>0.37<br>0.44<br>0.34<br>0.7<br>0.55<br>-0.56<br>0.25 | 3.44<br>1.35<br>1.47<br>0.09<br>-0.03<br>4.23<br>1.74<br>6.17 | 8.82          | 0.54               |
| ITCS108 | 4     | 13.7876<br>13.9597<br>14.0138<br>14.0576                                            | 43.888<br>43.8716<br>43.8572<br>43.8383                                            | 2             | 97.63<br>110.3<br>120.84<br>125.97                                           | 35         | 90          | 13.96<br>4.63<br>4.1<br>4.09                                 | 0<br>0.95<br>0.79<br>0.38                                 | 13<br>2.89<br>2.93<br>3.71                                    | 10.46         | 0.38               |
| ITCS112 | 7     | 10.2684<br>10.3005<br>10.33<br>10.4073<br>10.4304<br>10.4715<br>10.4882             | 45.1523<br>45.1448<br>45.1357<br>45.0967<br>45.0814<br>45.0425<br>45.021           | 2.5           | 108.44<br>113.73<br>125.59<br>133.16<br>143.23<br>151.05<br>159.38           | 35         | 90          | 2.66<br>2.53<br>7.47<br>2.49<br>5.39<br>2.73<br>2.59         | 0<br>0.23<br>0.52<br>0.33<br>0.44<br>0.34<br>0.36         | 2.43<br>1.78<br>6.62<br>1.72<br>4.61<br>2.02<br>2.23          | 6.1           | 0.91               |
| ITCS127 | 5     | 13.069<br>13.1214<br>13.2296<br>13.234<br>13.2246                                   | 43.108<br>43.0434<br>42.8289<br>42.8038<br>42.7776                                 | 1.5           | 149.37<br>159.75<br>172.54<br>194.8<br>205.68                                | 38.5       | 270         | 8.35<br>25.42<br>2.81<br>3.01<br>7.21                        | 0<br>0.97<br>1.2<br>2.1<br>1.02                           | 7.38<br>23.25<br>-0.49<br>-0.11<br>6.19                       | 13.65         | 0.5                |
| ITCS128 | 2     | 13.25<br>13.2675                                                                    | 42.8252<br>42.7318                                                                 | 2             | 172.16<br>156.41                                                             | 47.5       | 270         | 10.47<br>13.17                                               | 0<br>-0.89                                                | 11.36<br>14.06                                                | 9.49          | 0.5                |
| ITCS129 | 5     | 12.3664<br>12.412<br>12.7654<br>12.9292<br>12.9475                                  | 43.7636<br>43.7252<br>43.4761<br>43.2542<br>43.2113                                | 1             | 139.57<br>134.32<br>151.7<br>162.54<br>177.08                                | 32.5       | 270         | 5.63<br>39.76<br>28<br>4.99<br>13.54                         | 0<br>-0.65<br>2.16<br>1.34<br>1.8                         | 6.27<br>38.24<br>24.5<br>1.85<br>11.74                        | 16.75         | 0.5                |
| ITCS130 | 2     | 13.3092<br>13.3358                                                                  | 42.6086<br>42.5507                                                                 | 3.9           | 161.35<br>140.3                                                              | 50         | 270         | 6.79<br>15.02                                                | 0<br>-1.11                                                | 7.9<br>16.13                                                  | 9.27          | 1                  |
| ITCS134 | 4     | 13.889<br>14.0346<br>14.2348<br>14.3091                                             | 42.6393<br>42.6716<br>42.7239<br>42.7331                                           | 4.5           | 73.36<br>70.47<br>80.3<br>92.46                                              | 60         | 135         | 12.47<br>17.4<br>6.17<br>8.01                                | 0<br>-0.15<br>0.52<br>0.65                                | 12.62<br>17.03<br>5<br>7.36                                   | 12.12         | 0.74               |
| ITCS135 | 1     | 13.3987                                                                             | 42.5078                                                                            | 12            | 76.31                                                                        | 65         | 135         | 41.59                                                        | 0                                                         | 41.59                                                         | 8.83          | 0.74               |
| ITCS136 | 4     | 12.4095<br>12.8564<br>13.0786                                                       | 43.8095<br>43.5638<br>43.3188                                                      | 2.8           | 127.47<br>146.62<br>155.86                                                   | 35         | 270         | 45.21<br>32.62<br>21.78                                      | 0<br>1.54<br>0.74                                         | 43.67<br>30.34<br>20.02                                       | 11.16         | 0.5                |

Continued on next page

**Table S1 – continued from previous page**

| Name    | #segs | Lon<br>(°) | Lat<br>(°) | Depth<br>(km) | Strike<br>(°) | Dip<br>(°) | Rake<br>(°) | Lenx1<br>(km) | Offsx2<br>(km) | Lenx2<br>(km) | Width<br>(km) | Sliprate<br>(mm/y) |
|---------|-------|------------|------------|---------------|---------------|------------|-------------|---------------|----------------|---------------|---------------|--------------------|
|         |       | 13.188     | 43.1399    |               | 168.62        |            |             | 14.79         | 1.02           | 13.77         |               |                    |
| ITCS154 | 5     | 14.505     | 43.0982    | 2.6           | 127.52        | 40         | 90          | 3.98          | 0              | 3.46          | 9.96          | 0.5                |
|         |       | 14.5439    | 43.0764    |               | 135.39        |            |             | 6.3           | 0.52           | 4.46          |               |                    |
|         |       | 14.5984    | 43.0362    |               | 154.9         |            |             | 13.66         | 1.31           | 11.07         |               |                    |
|         |       | 14.6696    | 42.9249    |               | 173.94        |            |             | 17.19         | 1.28           | 17.75         |               |                    |
|         |       | 14.6918    | 42.771     |               | 146.82        |            |             | 8.33          | -1.84          | 10.17         |               |                    |
| ITCS155 | 5     | 14.4095    | 43.242     | 3.2           | 300.01        | 53.5       | 90          | 4.43          | 0              | 3.78          | 8.46          | 0.08               |
|         |       | 14.3623    | 43.2619    |               | 314.62        |            |             | 6.48          | 0.64           | 5.42          |               |                    |
|         |       | 14.3054    | 43.3029    |               | 323.94        |            |             | 6.28          | 0.41           | 5.21          |               |                    |
|         |       | 14.2597    | 43.3485    |               | 338.97        |            |             | 8.08          | 0.66           | 6.78          |               |                    |
|         |       | 14.2237    | 43.4164    |               | 353.42        |            |             | 11.83         | 0.64           | 11.19         |               |                    |
| ITCS156 | 7     | 13.9387    | 43.4238    | 2.1           | 163.42        | 44.5       | 90          | 0.95          | 0              | 0.66          | 6.28          | 0.2                |
|         |       | 13.9421    | 43.4155    |               | 170.87        |            |             | 6.22          | 0.29           | 5.71          |               |                    |
|         |       | 13.9543    | 43.3603    |               | 176.46        |            |             | 7.86          | 0.22           | 8.21          |               |                    |
|         |       | 13.9604    | 43.2896    |               | 162.09        |            |             | 6.17          | -0.56          | 6.98          |               |                    |
|         |       | 13.9838    | 43.2368    |               | 155.81        |            |             | 7.85          | -0.25          | 7.82          |               |                    |
|         |       | 14.0235    | 43.1724    |               | 162.86        |            |             | 7.37          | 0.28           | 6.56          |               |                    |
|         |       | 14.0503    | 43.109     |               | 176.52        |            |             | 9.78          | 0.54           | 9.24          |               |                    |
| ITCS158 | 4     | 14.4468    | 43.2007    | 4.3           | 292.3         | 36         | 90          | 12.2          | 0              | 10.85         | 9.7           | 0.08               |
|         |       | 14.3079    | 43.2424    |               | 311.86        |            |             | 9.44          | 1.35           | 6.15          |               |                    |
|         |       | 14.2211    | 43.299     |               | 339.72        |            |             | 21.12         | 1.95           | 18.33         |               |                    |
|         |       | 14.1303    | 43.4772    |               | 352.09        |            |             | 11.07         | 0.85           | 10.22         |               |                    |
| ITCS159 | 4     | 14.1171    | 43.0081    | 4.8           | 162.91        | 48.5       | 90          | 5.47          | 0              | 5.24          | 4.27          | 0.2                |
|         |       | 14.1369    | 42.9611    |               | 171.96        |            |             | 5.93          | 0.22           | 5.44          |               |                    |
|         |       | 14.147     | 42.9083    |               | 182.69        |            |             | 5.39          | 0.27           | 4.75          |               |                    |
|         |       | 14.1439    | 42.8599    |               | 197.35        |            |             | 8.93          | 0.36           | 8.56          |               |                    |

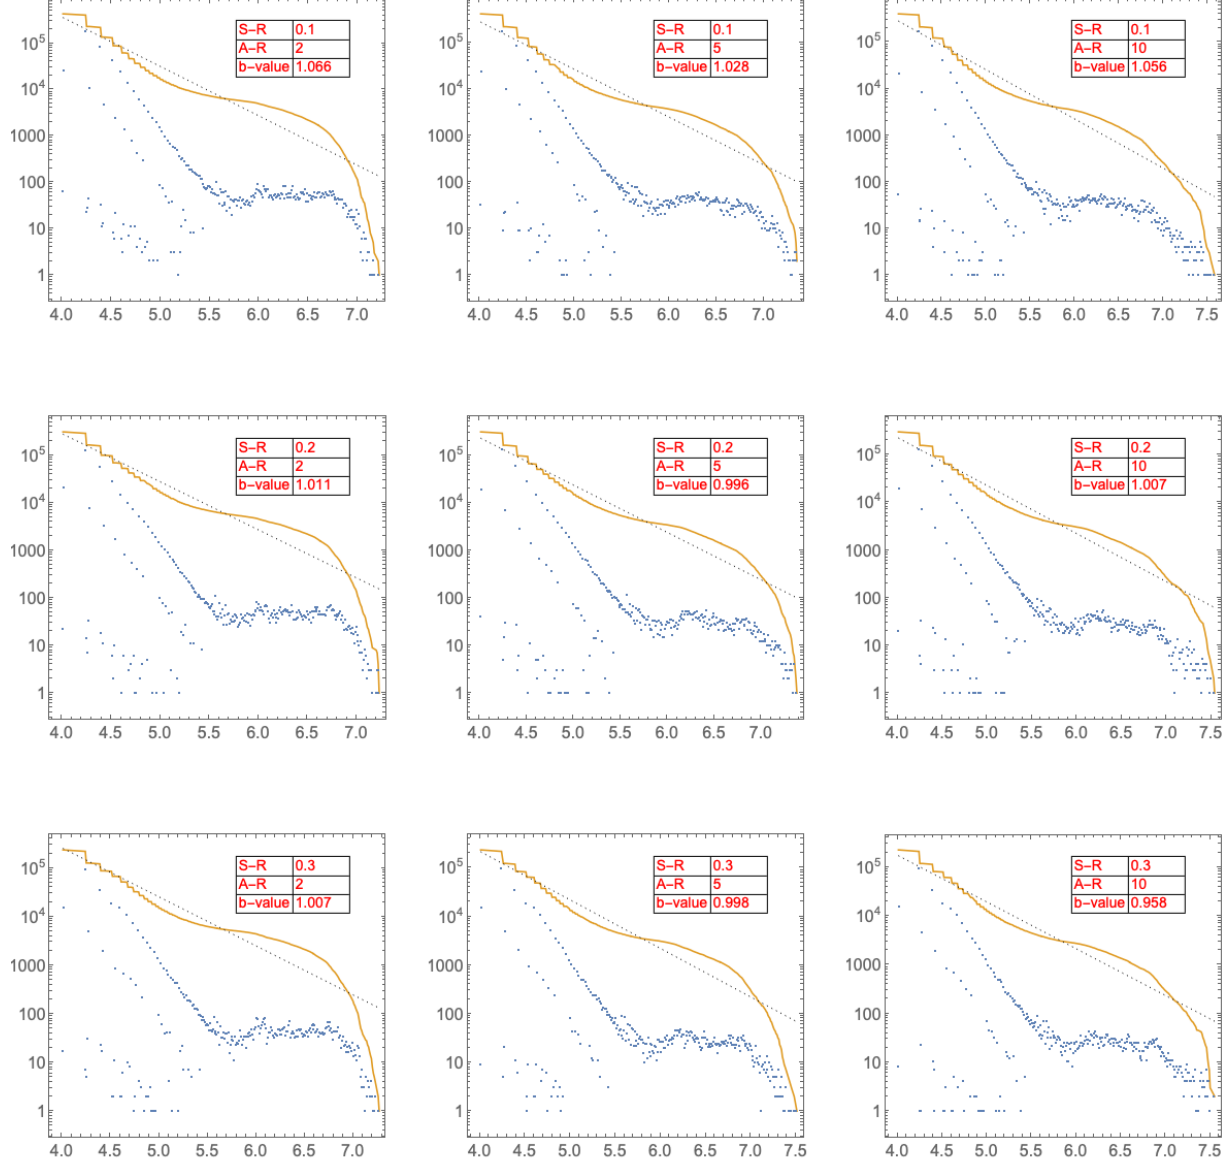

Figure S1: Cumulative (yellow line) and density (blue dots) Magnitude-Frequency distributions of  $M_w \geq 4.2$  earthquake simulated catalogues, for the 9 combinations of free parameters of Table 3 considered in this study. The straight dotted lines show the best-fit Gutenberg-Richter distributions.

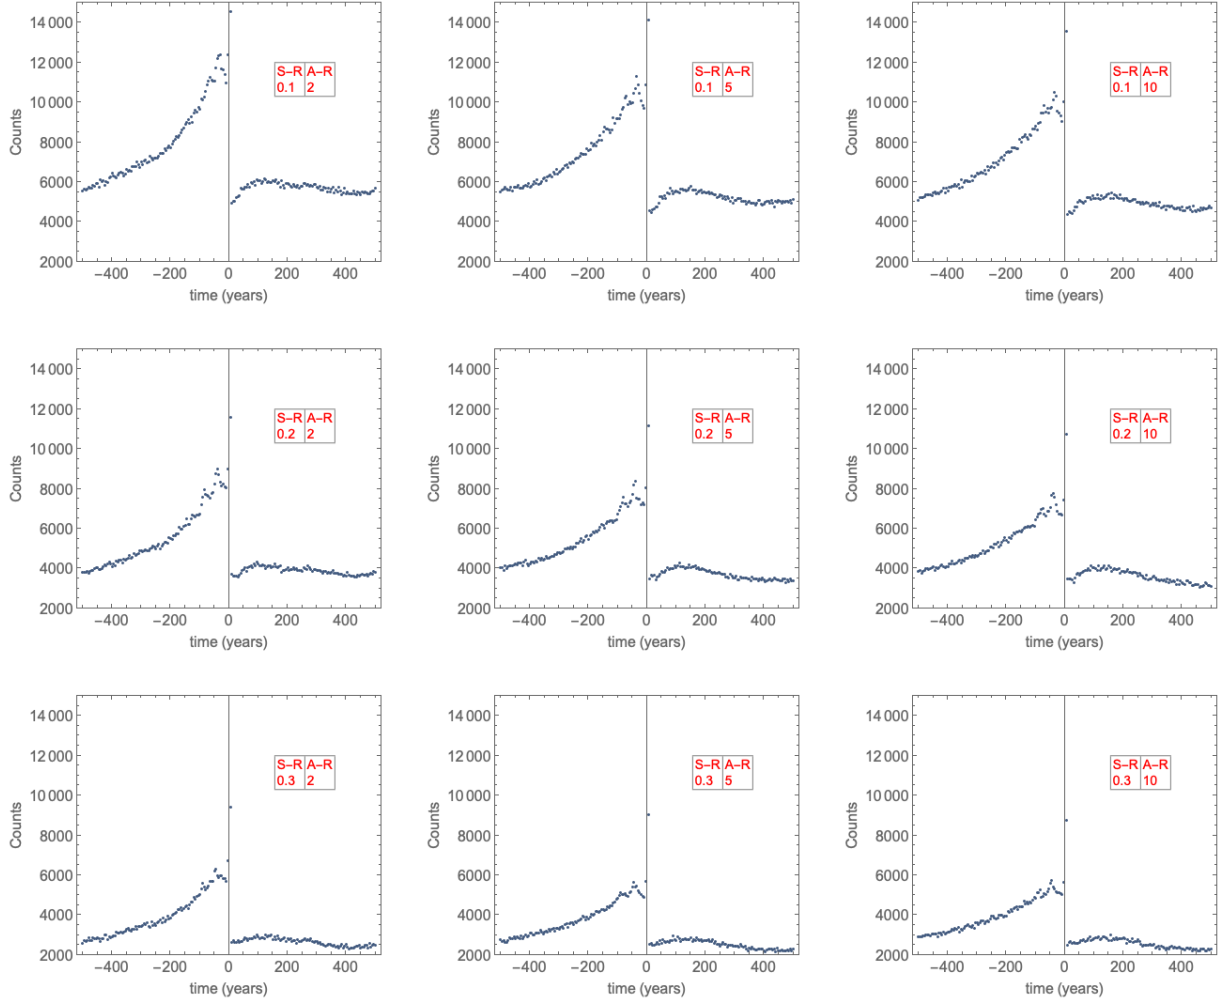

Figure S2: Stacked number of  $M_w \geq 4.2$  earthquakes that preceded and followed an  $M_w \geq 5.2$  earthquake within an epicentral distance of 20 km in the 100 Kyr simulated catalogue, for the 9 combinations of free parameters of Table 3 considered in this study.



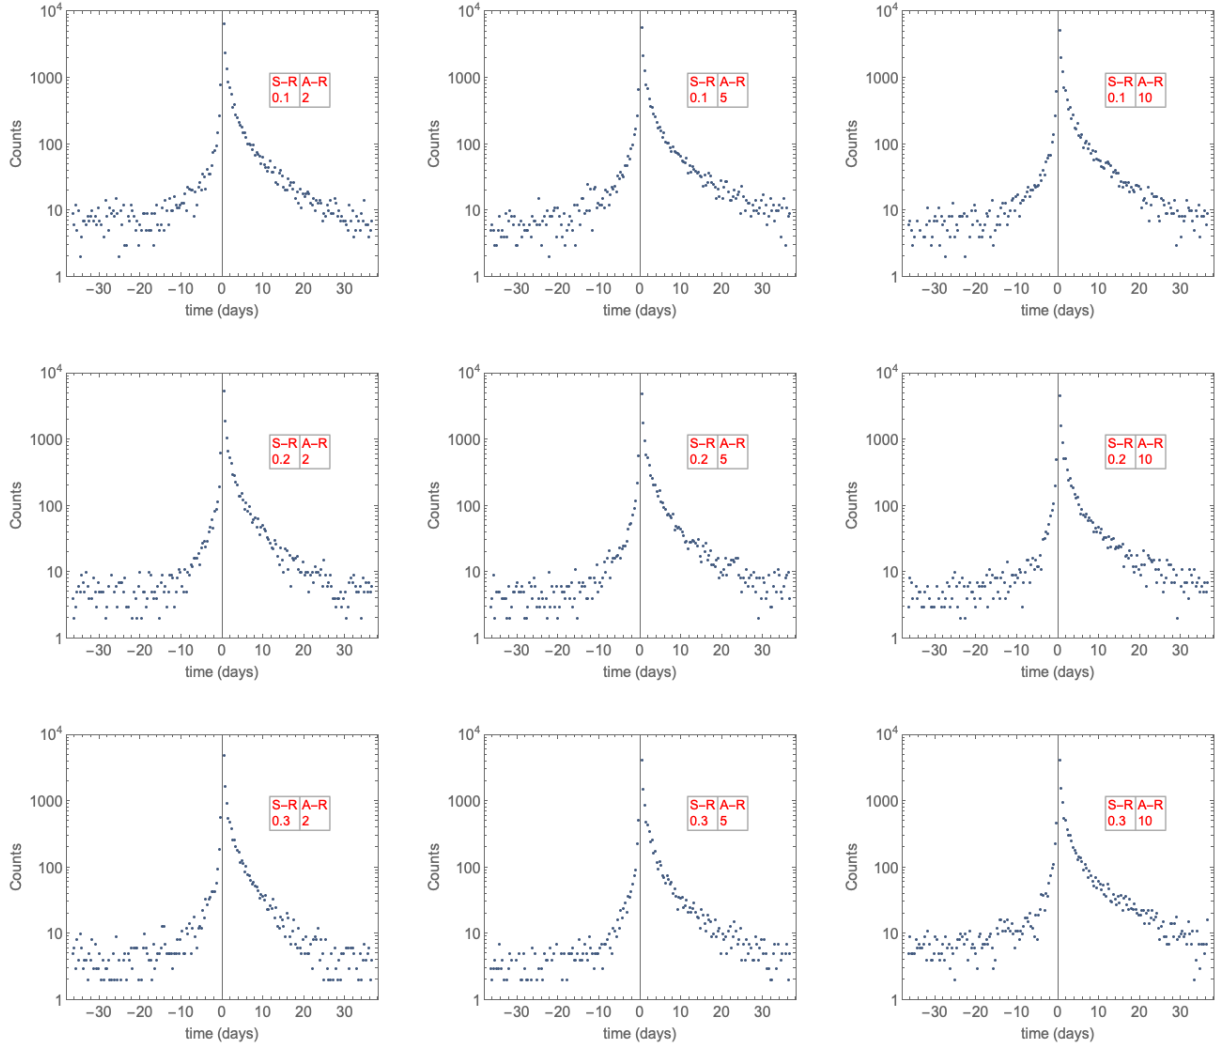

Figure S3: (a) As in figure S2, within an epicentral distance of 50 km, zooming on a time scale spanning only 0.1 years (36.5 days) before and after an earthquake of  $M_w \geq 5.2$ .

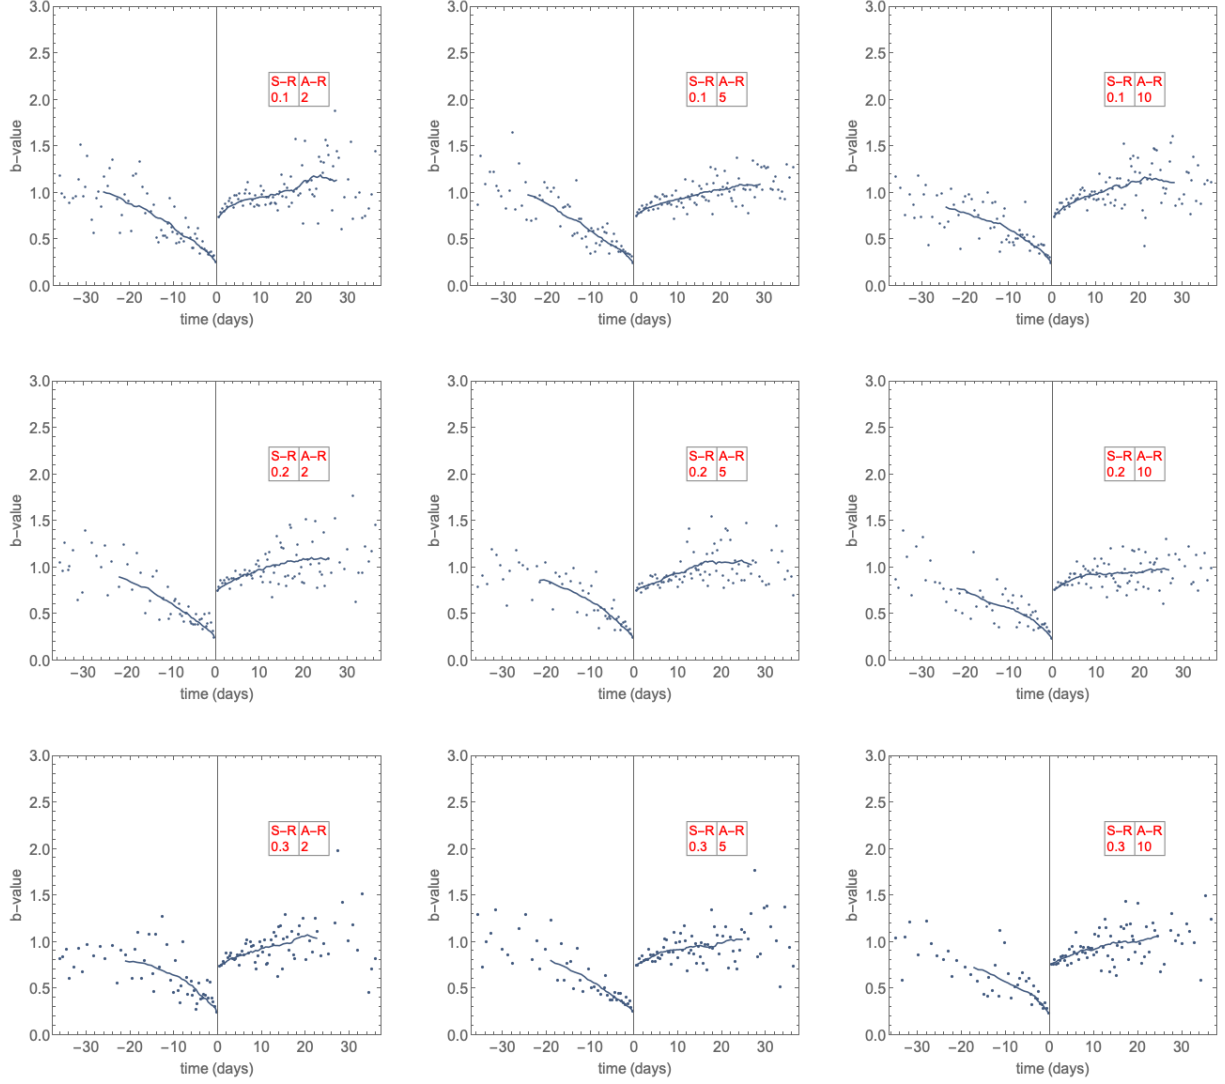

Figure S3: (b) b-value in the time bins of 0.365 days before and after an earthquake of  $M_w \geq 5.2$  containing at least 10 events, for the 9 combinations of free parameters of Table 3 considered in this study.

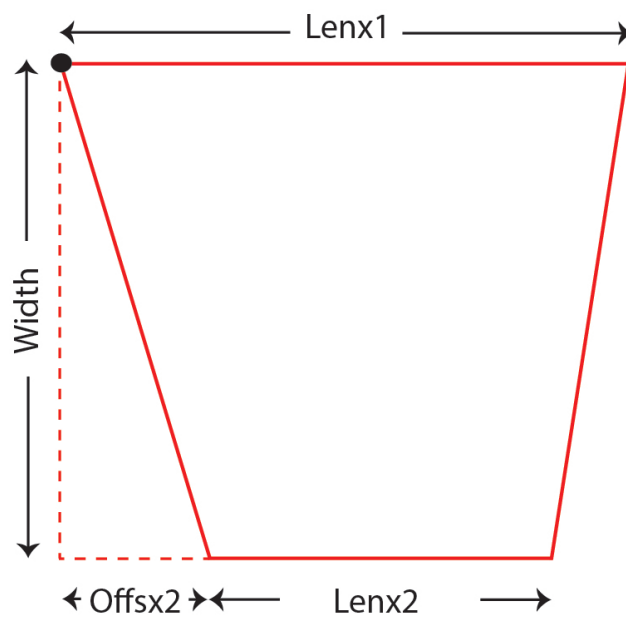

Figure S4: Sketch of a fault segment characterised by a set of geometric parameters ( $\text{lenx1}$ ,  $\text{lenx2}$ ,  $\text{Offsx2}$ , and  $\text{width}$ ). Geometric coordinates refer to the upper left edge of the fault (shown by the black dot).
